# Supplementary material for: Improved survival rate and minimal side effects of doxorubicin for lung metastasis using engineered discoidal polymeric particles
Source: Royal Society of Chemistry journal article supplement (doi:10.1039/d2bm00718e), 2022-01-01
Supplement: d2bm00718e1.pdf [file d2bm00718e1.pdf]

## Supporting Information

### **Improved Survival Rate and Minimal Side Effects of Doxorubicin for Lung Metastasis using Engineered Discoidal Polymeric Particles**

Sanghyo Park<sup>a§</sup>, Hyungkyu Park<sup>a§</sup>, Chaewon Park<sup>a</sup>, Wan Su Yun<sup>b,c</sup>, Soonjae Hwang<sup>d,e</sup>, Hong Yeol Yoon<sup>b,c</sup>, Ick Chan Kwon<sup>b,c</sup>, Kwangmeyung Kim<sup>b,c</sup>, Jaehong Key<sup>a\*</sup>

#### **Contents**

#### **Supporting Figures**

**Figure S1** In vivo fluorescent images of metastatic lung cancer induced by SCC7.

**Figure S2** Ex vivo fluorescence images 24 h after DOX-DPP injection in SCC7-induced metastatic lung cancer.

**Figure S3** Mean number of nodules in each group.

**Table S1** Drug content in DOX-DPPs according to the drug input.

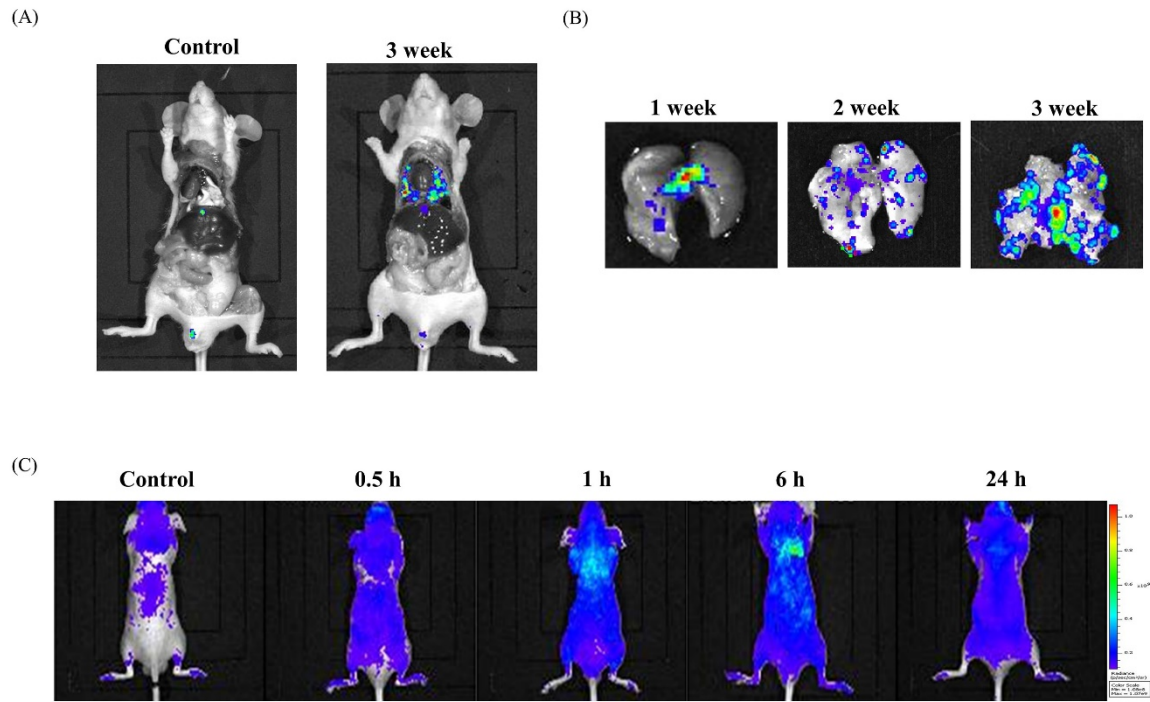

**Supplemental Figure 1. (A, B) In vivo fluorescent images of metastatic lung cancer induced by SCC7 measured as the GFP signal. (C) Biodistribution of DOX-DPP via intravenous injection measured as the DOX signal.**

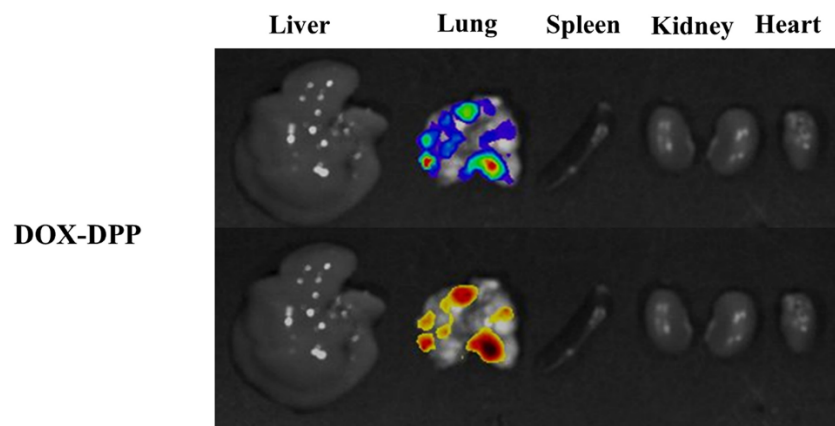

**Supplemental Figure 2. Ex vivo fluorescence images 24 h after DOX-DPP injection in SCC7-induced metastatic lung cancer.**

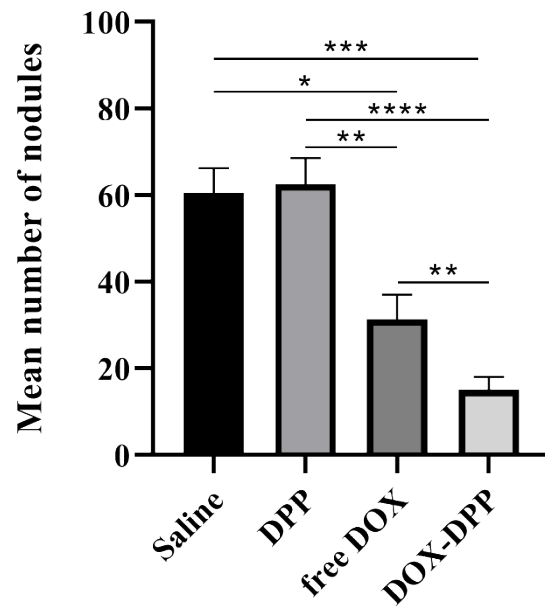

**Supplemental Figure 3.** Mean number of nodules in each group.

**Supplemental Table 1. Loading content for DOX-DPPs**

| PLGA (mg) | Doxorubicin (mg) | Loading content (%) |
|-----------|------------------|---------------------|
| 70        | 5                | 12.95 ± 0.88        |
| 70        | 9                | 23.44 ± 0.64        |
| 70        | 15               | 23.10 ± 0.9         |
